# Extracting nanoscale morphology from localizations

Zach Marin<sup>1,2,3,\*</sup>, Lukas A. Fuentes<sup>2,\*</sup>, Joerg Bewersdorf<sup>2,3,4</sup>, and David Baddeley<sup>1,2,†</sup>

<sup>1</sup>Auckland Bioengineering Institute, University of Auckland, Auckland, New Zealand

<sup>2</sup>Department of Cell Biology, Yale University School of Medicine, New Haven, CT, USA

<sup>3</sup>Department of Biomedical Engineering, Yale University, New Haven, CT, USA

<sup>4</sup>Department of Physics, Yale University, New Haven, CT, USA

\*Equal first authors

†Correspondence: [d.baddeley@auckland.ac.nz](mailto:d.baddeley@auckland.ac.nz)

**ABSTRACT** Membrane surface reconstruction at the nanometer scale is required for understanding mechanisms of subcellular shape change. This historically has been the domain of electron microscopy, but extraction of surfaces from specific labels is a difficult task in this imaging modality. Existing methods for extracting surfaces from fluorescence microscopy have poor resolution or require high-quality super-resolution data that is manually cleaned and curated. Here we present a new method for extracting surfaces from generalized single-molecule localization microscopy (SMLM) data. This makes it possible to study the shape of specifically-labelled continuous structures inside of cells. We validate our method using simulations and demonstrate its reconstruction capabilities on SMLM data of the endoplasmic reticulum and mitochondria. Our method is implemented in the open-source Python Microscopy Environment.

**SIGNIFICANCE** We introduce a novel tool for reconstruction of subcellular membrane surfaces from single-molecule localization microscopy data and use it to visualize and quantify local shape and membrane-membrane interactions. We benchmark its performance on simulated data and demonstrate its fidelity to experimental data.

## INTRODUCTION

Changes in cellular membrane shape are linked to viral replication, Alzheimer's disease, heart disease and an abundance of other maladies (1–7). Understanding the morphological mechanisms behind these diseases requires imaging not only the locations of protein clusters causing structural changes in a membrane, but finding the underlying shape of the membrane at relevant size scales. Some membranous organelles, such as the endoplasmic reticulum (ER) and the Golgi, have diameters as small as ~ 50 nm, requiring an image resolution of 25 nm or better to properly resolve structure (8, 9).

Electron microscopy (EM) techniques have a resolution of 2 nm or better and are well-suited to imaging membranes. However, segmentation of membrane structures from EM images can be arduous (10, 11) and it can be difficult to label and identify specific proteins in EM samples. Immunolabeling with gold nanoparticles, the most common method for specifically labeling proteins in EM samples, requires fixation methods that often destroy cellular structures, and gold nanoparticle locations must be individually extracted from among other, unstained cellular features (12, 13).

Fluorescence microscopy techniques can be used to spectrally separate multiple fluorescent labels, allowing for easy identification of both membrane-associated and membrane-interacting proteins. However, conventional fluorescence microscopy techniques achieve a resolution no better than 250 nm and are therefore unable to visualize membrane curvature at true size scales. Single-molecule localization microscopy (SMLM) techniques, such as PALM, STORM, and PAINT, image the positions of proteins with ~ 10 – 20 nm resolution (14). This is sufficient for imaging membrane structural changes of interest (15). In contrast to EM imaging techniques, which show a continuous membrane, SMLM yields a sparse and noisy point cloud of fluorophore locations, each with an uncertainty that depends on the brightness of the underlying blinking event. To visualize and quantify a membrane, it is necessary to interpolate a continuous surface through these positions.

In the fields of remote sensing (16) and 3D scanning (17), Screened Poisson Reconstruction (SPR) (18) is often used to extract surfaces from point clouds. SPR reconstruction is designed to follow point locations exactly, giving it high fidelity to collected positions. SPR has been applied to SMLM data (19), but this required extremely high quality data that was manually curated and pre-processed. Due to labelling inefficiencies and sampling, SMLM data often shows holes in large regions of a structure. Fluorescent labels often bind to not only molecules of interest, but to other, non-specific targets in the sample. This and sample autofluorescence can generate spurious background localizations (20). The stochastic nature of SMLM imaging means each fluorescent molecule may blink multiple times thus appearing as multiple points, each in a slightly different spot. Adhering strictly to all of these points will not necessarily generate an accurate surface approximation of the underlying structure the point cloud represents.

Z. Marin, L.A. Fuentes, J. Bewersdorf and D. Baddeley

In order to generate an accurate surface from general SMLM data, it is necessary to account for the localization precision of each point. By weighting each point's influence on surface structure by its precision, a surface is allowed to move away from points with low uncertainty while still adhering to the data. This makes it possible to ignore contributions of poorly-localized spots arising from auto-fluorescence and non-specific binding. Zhao et al. developed theory for incorporating localization uncertainty to fit SMLM data sets, but did not create an implementation (21). To our knowledge, no research group has demonstrated a general method for fitting surfaces to SMLM data that leverages information about localization uncertainties.

Here we present a novel algorithm that creates surfaces from SMLM point clouds yielded by a sparsely-labeled, continuous structure. Our algorithm incorporates localization uncertainty into its fitting routine and works for any SMLM data set. Smoothing techniques are often applied to extracted surfaces to achieve reasonable shapes (22, 23), and such an approach is used in our method. This algorithm is implemented in PYthon Microscopy Environment Visualize<sup>1</sup> for ease-of-use, integration with additional SMLM acquisition and analysis techniques, and the ability to pass localizations acquired via a user's microscope and software of choice to the algorithm (24).

## MATERIALS AND METHODS

Our algorithm (a shrink-wrapping method) is sketched in Figure 1. It takes an initial, coarse surface that loosely approximates a point cloud and iteratively refines the structure under point fidelity and curvature constraints.

### Initial / starting mesh

A set of single-molecule localizations, which are expected to sample a continuous structure, are placed in a sparse octree data structure (25). The octree is truncated at a given minimum number of localizations per octree cell (equivalent to a minimum signal-to-noise ratio—see (26)). This has the effect of dividing the volume into cubic cells with sizes that adapt to local point density. Cells will be large in areas with few localizations, and small in areas which are localization dense. Cells containing fewer than the minimum number of points are not stored. The result is a volumetric data structure that contains the same information as a regularly sampled grid, but requires significantly less memory. The density of localizations in each cell is calculated. The Dual Marching Cubes algorithm is run on these cells with a given threshold density (27). The result is a manifold triangular mesh that separates high from low density areas. Because of sparsity in SMLM labelling, the threshold density is ideally set a bit low in order to create a single surface that encapsulates the whole structure.

### Topology modification

A purposefully low threshold density occasionally misrepresents a disconnected portion of the structure sampled by the localizations as connected. To address this, vertices with highly negative Gaussian curvature are deleted, and resulting holes in the mesh are stitched with fresh triangles. This operation removes false, thin necks in between portions of the surface. This operation is performed in regular intervals throughout our iterative fitting process.

### Mesh quality

Our surface is periodically remeshed to improve the numerical quality of subsequent calculations (28). Remeshing consists of a number of operations—splitting long edges, collapsing short edges, “flipping” edges where too many are incident on a vertex, and regularly spacing vertices along the surface. Together, these remeshing operations result in a well-formed mesh where the edge lengths are roughly constant, the number of edges incident on a single vertex is roughly constant, and the triangles are roughly equilateral.

The minimum edge length of the mesh needs to sample all available data. This means properly sampling the size scale of our smallest available features, which are at the size scale of the minimum localization precision in the input point cloud. Starting from the edge length size of the input coarse isosurface, the mesh edge lengths decrease linearly with each remeshing step toward  $\frac{\min_i \sigma_i}{2.5}$ —that is, toward 0.4× the minimum localization precision. This ensures the iterative fitting makes large adjustments early in the fitting and fits detailed features later on.

### Mesh optimisation

The resulting mesh is refined to achieve high fidelity to the localization input data under a curvature constraint. This is expressed mathematically as a minimization problem:

---

<sup>1</sup><https://python-microscopy.org>

$$\arg \min_{\mathbf{v}} \left\| \frac{1}{\sigma \left( \frac{\|\mathbf{p} - \mathbb{A}(\mathbf{v})\|}{2\sigma} + 1 \right)} (\mathbf{p} - \mathbb{A}(\mathbf{v})) \right\|^2 + \lambda^2 \|\mathbb{B}(\mathbf{v})\|^2 \quad (1)$$

where  $\mathbf{p}$  is a vector containing localization positions,  $\mathbf{v}$  is a vector containing mesh vertex positions, the  $\mathbf{p} - \mathbb{A}(\mathbf{v})$  term represents the distances between each localization and the mesh,  $\sigma$  is a vector containing localization uncertainties,  $\mathbb{B}(\mathbf{v})$  encodes a curvature penalty, and  $\lambda$  is a constant controlling the relative weighting of point fidelity and curvature terms. This is iteratively solved using a conjugate gradient method (29).

If, after refinement, the mesh does not change shape significantly as compared to its shape in the previous iteration, or if the given maximum number of iterations is reached, the algorithm terminates and the resulting surface is presented as an approximation of the underlying structure. Otherwise, the surface is passed back to the topology modification step and all subsequent steps repeat.

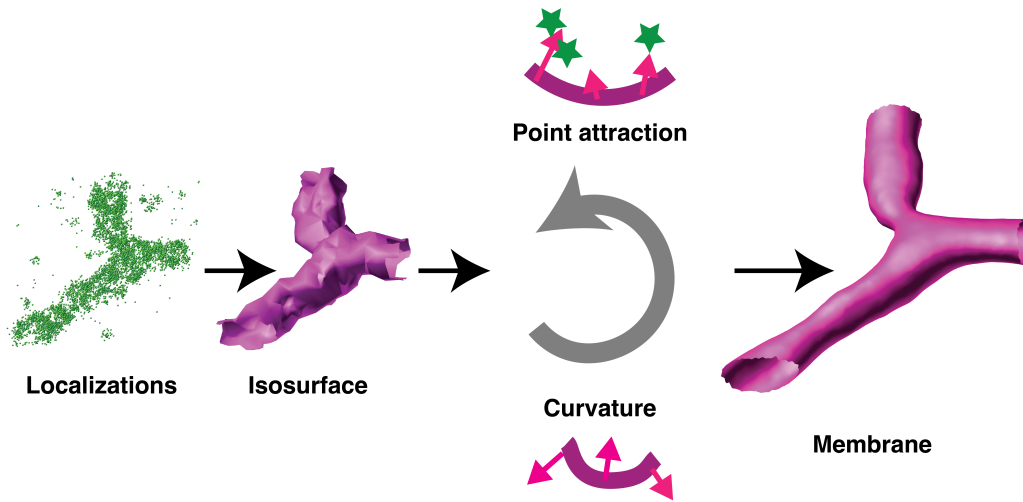

Figure 1: A flow diagram of the proposed algorithm. Localization data is first approximated by a coarse, density-based isosurface. This surface is topologically modified to remove thin necks, remeshed for improved numerical quality, and then moved toward the localizations subject to a curvature force constraint. The pipeline runs iteratively until stopping criteria are met. The result is a membrane approximation of the underlying continuous structure sampled by the input localizations.

### Point fidelity term

*Notation:*

- $\mathbf{p}$  the  $N \times 3$  array of fluorophore localizations
- $\mathbf{p}_i = \vec{p}_i$  the  $i$ th localization ( $1 \times 3$ )
- $\sigma$   $N \times 3$  array of the uncertainty of the localizations
- $\sigma_i$  the uncertainty of the  $i$ th localization ( $1 \times 3$ )
- $\mathbf{v}$  the  $M \times 3$  array of mesh vertices
- $\mathbf{v}_k = \vec{v}_k$  the  $k$ th mesh vertex ( $1 \times 3$ )
- $\vec{v}_j$  the  $j$ th vertex of a given mesh face
- $\vec{v}_l$  the  $l$ th vertex neighbour of a given vertex

The point attraction term seeks to minimize the distance between each localization and the surface. For each localization, we approximate its distance to the surface as the distance to a proxy point formed by a linear combination of the three vertex positions that define its closest surface face. The weightings used in the linear combination are computed as follows, based on the inverse distance from a localization  $\vec{p}_i$  to each vertex  $\vec{v}_j$  in its nearest face.

$$w_{ij} = \frac{1}{\|\vec{p}_i - \vec{v}_j(\vec{p}_i)\|} \left/ \sum_{j=0}^2 \frac{1}{\|\vec{p}_i - \vec{v}_j(\vec{p}_i)\|} \right. \quad (2)$$

Z. Marin, L.A. Fuentes, J. Bewersdorf and D. Baddeley

The position of the proxy point is then calculated as

$$\mathbb{A}(\mathbf{v})_i = \sum_{j=0}^2 \vec{v}_j(\vec{p}_i) w_{ij}$$

giving the distance metric:

$$[\mathbf{p} - \mathbb{A}(\mathbf{v})]_i = \vec{p}_i - \sum_{j=0}^2 \vec{v}_j(\vec{p}_i) w_{ij}.$$

This metric is asymptotically equal to the true distance to the surface at small distances, but trends to the distance between the localization and the center of its nearest face (all vertices weighted equally) at large distances. This behaviour was deliberately chosen to ensure sensible updating of vertex positions—for a localization close to the surface we want it to mostly pull on the closest vertex, whereas a point that is far away (compared to the face edge length) should pull equally on all vertices of the face.

This distance metric is weighted by

$$\frac{1}{\sigma_i \left( \frac{[\mathbf{p} - \mathbb{A}(\mathbf{v})]_i}{2\sigma_i} + 1 \right)}$$

as shown in Equation 1. The  $\frac{1}{\sigma_i}$  term ensures distances near a localization produce minimal cost. The remaining fraction de-weights localizations that are particularly far away, while still letting them exert influence on the surface. This ensures the surface can shift to accurately fit all points in a point cloud if necessary, but places priority on moving toward the centroid of its nearby points first. Since localizations are Gaussian-distributed, they should exercise most of their influence within  $2\sigma_i$  of their position.

### Curvature term

When minimizing curvature at a vertex, there are multiple possible formulas to choose from. One of the simplest is the Laplacian discretization of the Canham-Helfrich bending energy (30),

$$E_{\text{bend}}(\vec{v}_k) = \frac{\kappa}{2} \frac{1}{\Omega_k} \left[ \sum_l \vec{v}_k - \vec{v}_l \right]^2$$

where  $\Omega_k = \frac{\sqrt{3}}{4} \sum_l \|\vec{v}_k - \vec{v}_l\|^2$ ,  $\vec{v}_l$  is the  $l$ th neighbor of vertex  $\vec{v}_k$ , and  $\kappa$  is the stiffness coefficient for the lipid composition of the membrane. The local bending energy at vertex  $\vec{v}_k$  can then be found by minimizing

$$\|\mathbb{B}_1(\mathbf{v}_k)\|^2 = \frac{1}{N^2} \left[ \sum_l (\vec{v}_k - \vec{v}_l) \right]^2 = [\vec{v}_k - \vec{c}_k]^2$$

or the squared distance between a vertex and the centroid of its neighbours ( $\vec{c}_k$ ). This formulation, however, leads to a shrinking of the membrane, with a surface constrained entirely by curvature eventually collapsing to an infinitely small sphere (a valid, but trivial solution to the bending energy minimization problem). As a result, balancing this curvature term with a point-attraction term will always lead to a surface approximation that lies inside the true surface. In practice, the shrinking effect is sufficiently strong that a curvature weighting ( $\lambda$ ) low enough for the point attraction to prevent excess shrinkage will lead to an excessively rough surface.

An alternative, area-preserving approach to curvature minimization ( $\mathbb{B}_2$ ) is to penalise the distance between a vertex and a location on the surface of a sphere fit to the vertex's neighboring vertices.  $\mathbb{B}_2$  can be approximated as

$$\begin{aligned} \mathbb{B}_2 &= \vec{v}_k - \frac{1}{N} \sum_l \left[ \vec{c}_k + \vec{n}_k \frac{(\vec{v}_l - \vec{c}_k) \cdot \vec{n}_k}{\sqrt{2\vec{n}_k \cdot \vec{n}_l + 1}} \right] \\ &= \vec{v}_k - \vec{c}_k - \vec{n}_k \frac{1}{N} \sum_l \frac{(\vec{v}_l - \vec{c}_k) \cdot \vec{n}_k}{\sqrt{2\vec{n}_k \cdot \vec{n}_l + 1}} \end{aligned}$$

where  $\vec{n}_k$  and  $\vec{n}_l$  are the normals of vertex  $k$  and its  $l$ th neighbour. This parameterization works when the surface is well-constrained by localization data, leading to a smooth surface with good affinity to the localizations, but can result in large, static

“blebs” in areas where the starting estimate was poor and localizations are sparse. Our empirical solution is to use  $\mathbb{B}_2$  where the influence of localization data is high, smoothly transitioning to the area minimizing approach,  $\mathbb{B}_1$ , as influence decreases. This gives  $\mathbb{B}$  the following form:

$$\begin{aligned}\mathbb{B} &= (1 - \alpha)\mathbb{B}_1 + \alpha\mathbb{B}_2 \\ &= \vec{v}_k - \vec{c}_k - \alpha \vec{n}_k \frac{1}{N} \sum_l \frac{(\vec{v}_l - \vec{c}_k) \cdot \vec{n}_k}{\sqrt{2\vec{n}_k \cdot \vec{n}_l + 1}}.\end{aligned}$$

The empirical value for alpha is

$$\alpha = \min\left(\|\mathbb{A}^\top \mathbb{I}\|^2, 1\right) = \min\left(\left[\sum_i w_{ij}\right]^2, 1\right)$$

where  $\mathbb{A}$  is the operator that generates point-fidelity proxy points and  $w_{ij}$  is as defined in equation 2 above.

## Simulation

SMLM point clouds were simulated from a theoretical figure eight, defined by a signed-distance function (see [Supplementary Information](#)). Simulations varied point-cloud density and number of background localizations.

## Quality evaluation

To assess the accuracy of the method described in this paper as compared to SPR, surfaces were fit to simulated point clouds and then compared to the theoretical structure giving rise to these point clouds. When making this comparison we must consider two types of error 1) the distance from the true surface to the reconstructed surface and 2) the distance from the reconstructed surface to the true surface. Although these might seem redundant at first glance, it is possible for a surface to appear good under metric 1 whilst having bad performance under metric 2. An example of this is a structure that mostly closely follows the true surface, but also has “blebs” or extrusions away from the true surface. Because the distance in metric 1 just considers the parts of the reconstruction which are closest to the true structure, “blebs” and extrusions are not penalised and metric 1 returns a small distance. A reconstruction which follows part of the ground truth correctly, but is truncated such that it does not extend into all areas of the ground truth, can score well on metric 2. A good reconstruction minimizes both of these metrics.

The distance between surfaces was calculated numerically as follows; a set of noise-free verification points were simulated exactly on the surface of the theoretical structure, and a set of noise-free points were simulated on the fit surface. The mean squared distance from the verification point set to its nearest neighbors in the mesh point set was computed as quality metric  $Q_1$ . The mean squared distance from the mesh point set to its nearest neighbors in the verification point set was computed as quality metric  $Q_2$ . Mesh quality was scored as a combination of the two error types:

$$Q = \sqrt{\frac{Q_1 + Q_2}{2}}$$

where  $Q$  is the root-mean-square error, representing the average distance from the mesh to the theoretical structure.

## Cell Culture

U-2 OS cells (HTB-96; ATCC; Lot: 70008732) were grown in McCoy’s 5A medium (16600-082; Gibco) supplemented with 10% FBS (10438-026; Gibco). These cells were subcultured with 0.05% Trypsin (Gibco).

## Sample preparation

Immunofluorescence samples were generally prepared as follows. Approximately 1 million cells in 90  $\mu$ L were transfected via electroporation with about 10  $\mu$ g of plasmid with a Super Electroporator NEPA21 Type II (Nepa Gene). The cells were then seeded onto coverslips that were, unless otherwise noted, treated in an ozone chamber for 30 minutes. Cells were chemically fixed the following day with 3% paraformaldehyde (15710; Electron Microscopy Sciences) and 0.1% glutaraldehyde (16019; Electron Microscopy Sciences) for 15 minutes at room temperature while gently rocking. The glutaraldehyde fixation was quenched by washing the samples with 0.1% sodium borohydride in 1 $\times$ PBS for 7 minutes followed by washing with 100 mM glycine in 1 $\times$  PBS for 10 minutes. Samples were then rinsed three times with 1 $\times$ PBS followed by a 3-minute incubation at room temperature with permeabilization buffer (0.3% IGEPAL CA-630 + 0.05% Triton X-100 + 0.1% (w/v) BSA in 1 $\times$  PBS)

Z. Marin, L.A. Fuentes, J. Bewersdorf and D. Baddeley

and another three rinses with 1×PBS. Samples were blocked for 1 hour at room temperature (0.05% IGEPAL CA-630 + 0.05% Triton X-100 + 5% normal goat serum in 1×PBS), followed by an overnight incubation with the primary antibody diluted in block buffer at 4° C while gently rocking. The following day, the samples were washed three times with wash buffer (0.05% IGEPAL CA-630 + 0.05% Triton X-100 + 0.2% (w/v) BSA in 1×PBS), incubated with secondary antibodies diluted in block buffer for 1 hour at room temperature while gently rocking, washed three more times with wash buffer, and finally rinsed three times with 1×PBS. For astigmatic/4Pi-DNA-PAINT imaging of overexpressed mCherry-Sec61 $\beta$  or 4Pi-DNA-PAINT imaging of TOMM20-mCherry, samples were immunolabeled with rabbit anti-mCherry primary at a 1:500 dilution (ab167453; Abcam) or rabbit anti-TOMM20 primary at a 1:500 dilution (sc-11415; Santa Cruz Biotechnology), respectively. Both samples were then labeled with an oligonucleotide-conjugated goat anti-rabbit IgG secondary antibody (115-005-146; Jackson ImmunoResearch) at a 1:200 dilution, as described previously (31). For two-color 4Pi-STORM imaging of overexpressed mCherry-Sec61 $\beta$  and endogenously expressed TOMM20, samples were labeled with a combo of two mouse anti-mCherry primaries each at a 1:250 dilution (GTX630195 and GTX630189; GeneTex) and rabbit anti-TOMM20 primary at a 1:500 dilution (see above). They were then labeled with a goat anti-rabbit secondary conjugated to AF647 at a 1:1000 dilution (20812; Biotium) and a goat anti-mouse secondary with a single conjugated CF660C dye on each secondary antibody at a 1:1000 dilution (A21245; Invitrogen). The mCherry-Sec61 $\beta$  plasmid was acquired from Addgene (49155).

## Microscopy

4Pi-SMS two-color samples of TOMM20 and mCherry-Sec61 $\beta$  were prepared and imaged using ratiometric dSTORM as described previously (32). 4Pi-SMS one-color DNA-PAINT samples were imaged on the same custom microscope, but with fluorogenic DNA-PAINT (see DNA-PAINT method below). Astigmatic data was collected using a custom-built microscope described previously (33) with the only filter used being a bandpass filter (FF01-694/SP; Semrock). Astigmatism was implemented by adding a cylindrical lens to the fluorescence light path.

## DNA-PAINT

All DNA-PAINT data was collected using the fluorogenic DNA-PAINT method described previously (31). Briefly, samples were imaged using the following imager probe containing a dye and a quencher: 5' - Cy3B - AAGAAGTAAAGGGAG - BHQ2 - 3'. This imager probe was diluted to 10 nM for both astigmatic and 4Pi imaging of mCherry-Sec61 $\beta$  and 1 nM for 4Pi-SMS imaging of TOMM20-mCherry in a high ionic-strength PBS-based buffer (1×PBS, 500 mM NaCl, 20 mM Na<sub>2</sub>SO<sub>3</sub>, and 1 mM Trolox, pH 7.3-7.5).

## RESULTS AND DISCUSSION

### Validation on test structures

A three-dimensional figure eight (two toruses touching) was simulated with both varying localization density and background (see [Supplementary Information](#)). For each condition, the parameters for both SPR and the method described in this paper were grid searched. The resulting meshes were scored as described in [Quality evaluation](#). For each condition, the mesh with the lowest RMS error ( $Q$ , see [Quality evaluation](#)) from each method was selected for comparison. The results are shown in Figure 2.

Both our method and SPR work well when there is a high density of points and low background. As density decreases and background increases, SPR has a harder time fitting an accurate surface. Our method continues to work, with RMS errors to the theoretical surface less than the localization precision ( $\sigma$ ) of the point cloud over a greater range of SMLM-like densities and backgrounds than SPR.

### Application to SMLM data

#### 4Pi PAINT SMLM

An SMLM image of overexpressed mCherry-Sec61 $\beta$  was taken using fluorogenic DNA-PAINT on a 4Pi-SMS microscope as described in [Sample preparation](#). 4Pi imaging provides isotropic resolution (32, 34). Our algorithm was applied to this data, resulting in a visually accurate surface fitting of ER, as shown in Figure 3. This surface carries quantitative information, such as axial position (Figure 3A and C) and curvature along the surface (Figure 3A and D). Cross-sections of the data show an accurate fitting of the surface to the point-cloud data (Figure 3E-G). Quantification of ER tubule diameter in a portion of this image is shown in Figure S1 and is in good agreement with previously reported values (35).

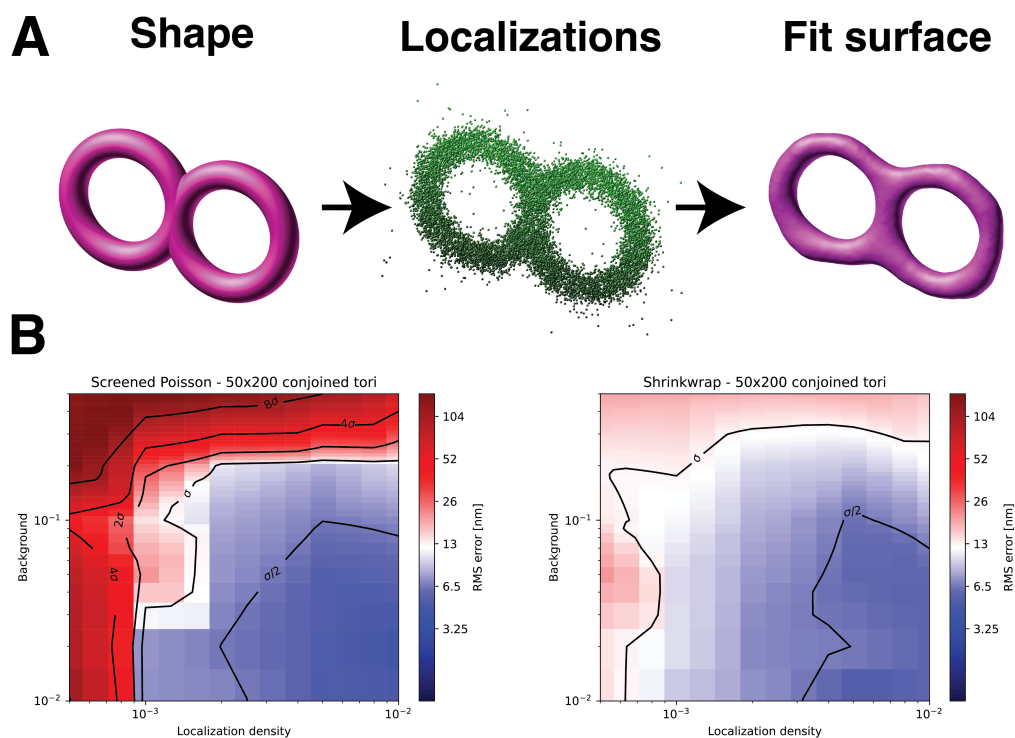

Figure 2: A comparison of SPR and our method on simulated point clouds of a 3D figure 8, which is approximately 800 nm in diameter and 100 nm thick. **A**, Our simulation method of going from a signed distance function to a set of localizations to a fit surface. **B**, Heat map plots of Screened Poisson Reconstruction and our method (Shrinkwrap) as a function of simulated localization density and background.

### Multimodal SMLM

To demonstrate the algorithm's use under varying conditions, surfaces were generated from data collected using 4Pi fluorogenic DNA-PAINT, 4Pi two-color dSTORM, and conventional astigmatism with fluorogenic DNA-PAINT. Our shrink-wrapping algorithm is able to produce reasonable surface estimations for these data sets, as shown in Figure 4. In two-color data, each color channel can be fit independently to yield relationships between surfaces (Figure 4 D-F). For example, the distance between surfaces can be calculated and visualized on the surfaces themselves (see Figure S2). This particular use has the potential to provide information about the location of membrane contact sites between the ER and other organelles that exhibit exceptionally small distances, 10 to 30 nm, between membranes (36). Poorer axial localization precision in the astigmatic data (Figure 4 G-I) leads to greater uncertainty in the fit along this direction. However, by averaging contributions of multiple localizations, the final position of the surface is quite reasonable.

### CONCLUSION

Examining the interplay of membrane surfaces and proteins is critical to understanding cellular function (37). The shrink-wrapping algorithm described in this paper provides a new way for researchers to quantify membrane surfaces from single-molecule localisation microscopy data. We believe it will enable them to investigate the structure and biophysical properties of organelle and cellular membranes and their associated proteins.

Our method enables higher fidelity to single-molecule localization microscopy data than previously-demonstrated methods, and functions across a wide range of localization densities and backgrounds. For ease-of-use, shareability and adaptability, it is packaged as open-source software and is accessible via an interactive GUI. It is sufficiently fast and memory-efficient to be used on standard lab computers (e.g. mid-range laptops). Our method is available for download as a PYME plugin at <https://github.com/python-microscopy/ch-shrinkwrap>.

Z. Marin, L.A. Fuentes, J. Bewersdorf and D. Baddeley

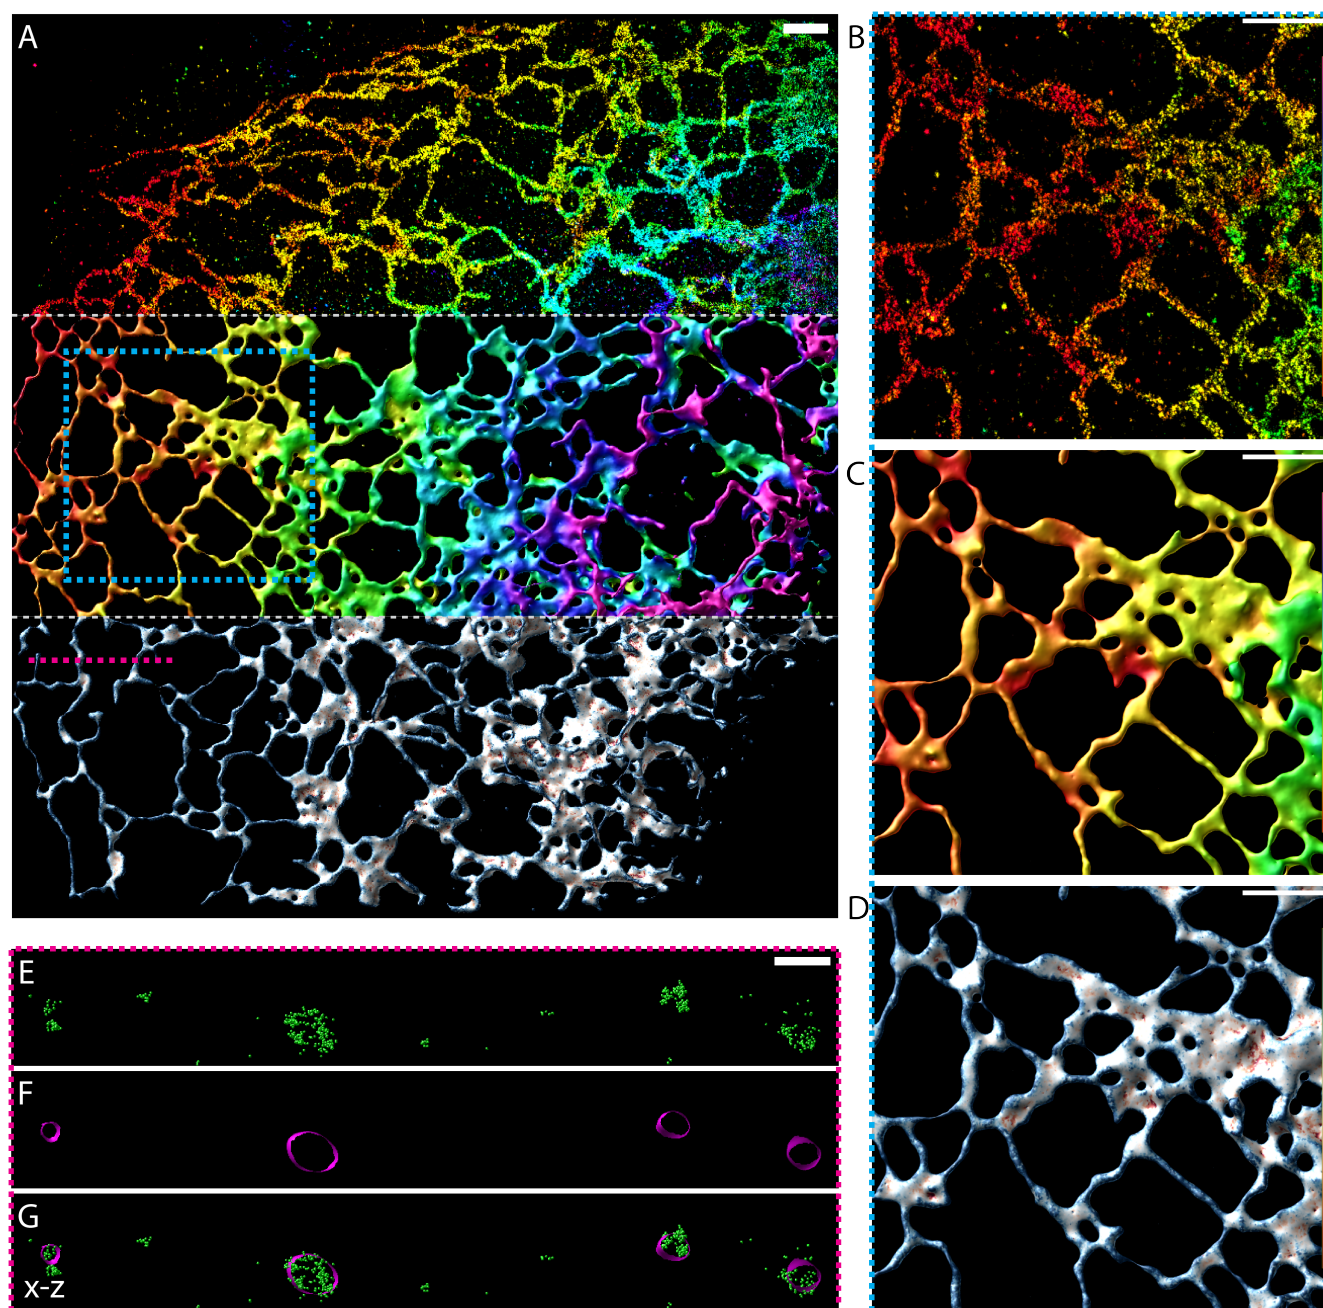

Figure 3: **A**, 4Pi fluorogenic DNA-PAINT data of mCherry-Sec61β; Top: Point-cloud data displayed as 10 nm point sprites with alpha set to 0.5 and colored by each point's position in z according to the lookup table described in B/C; Middle: The shrink-wrapped surface created based on the point-cloud data colored by each vertex's position in z according to the lookup table described in B/C; Bottom: The same shrink-wrapped surface, but colored by the mean curvature at each vertex according to the lookup table described in D. **B-D**, ROI shown by the hashed cyan box in A displayed in the three different ways described in A. B-C lookup table (from bottom to top): 0 to 800 nm. D lookup table:  $-0.01$  to  $0.01 \text{ nm}^{-1}$ . **E-G**, Cross section in x-z shown by the hashed magenta line in A. **E**, Point cloud displayed as 10 nm green spheres. **F**, Shrink-wrapped surface displayed in magenta. **G**, Point cloud and shrink-wrapped surface displayed together. Scale bars are 1  $\mu\text{m}$  (**A-D**) and 200 nm (**E-G**).



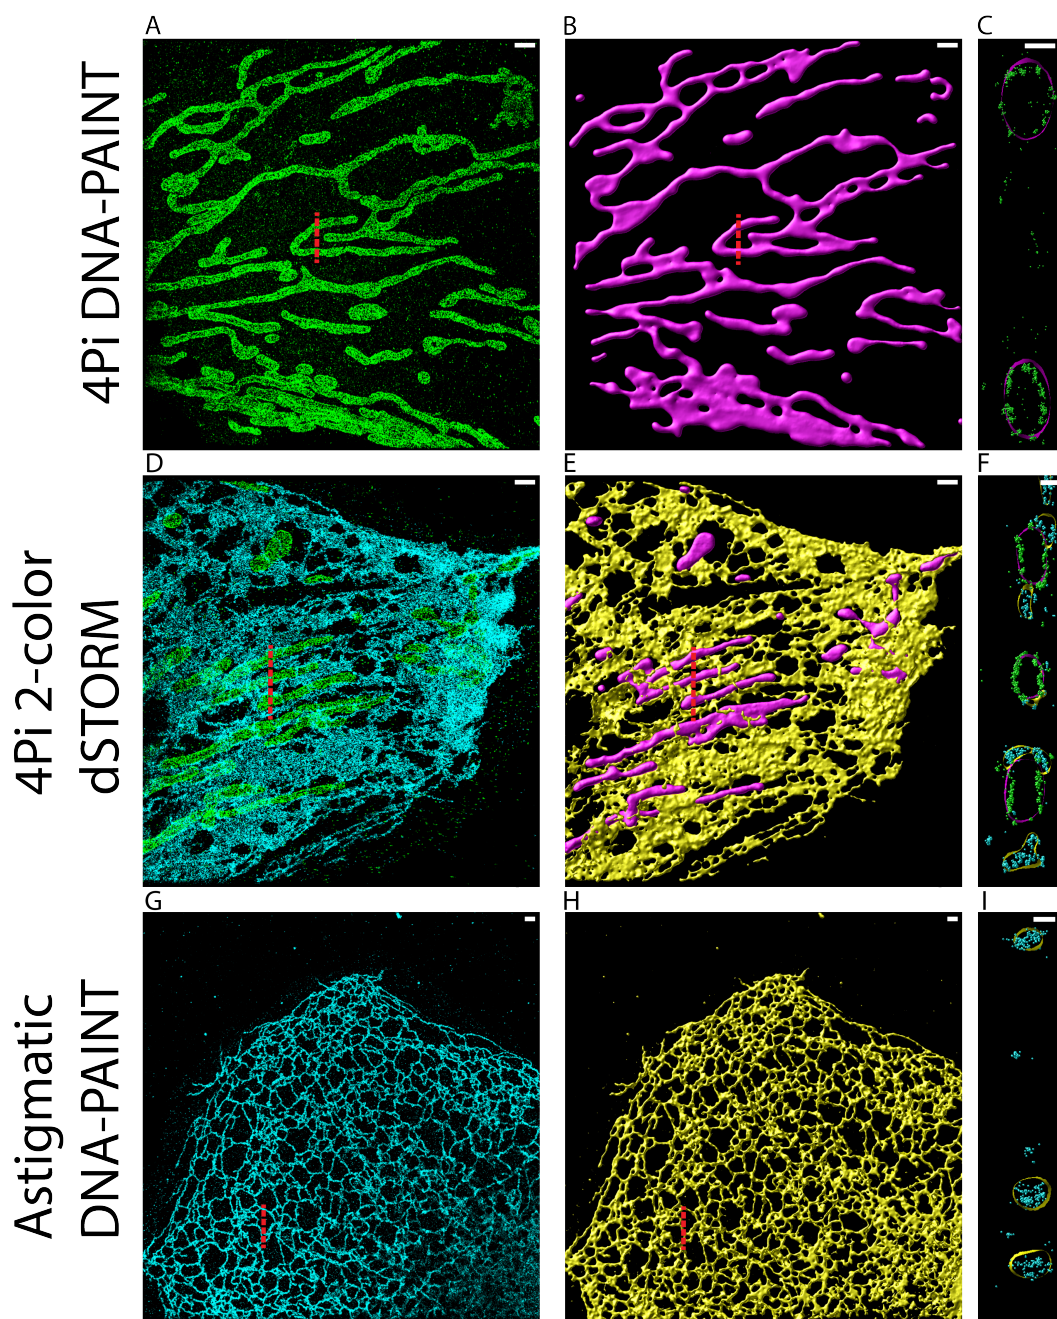

Figure 4: **Application of the algorithm on data from varying SMLM imaging modes.** **A-C**, 4Pi fluorogenic DNA-PAINT localizations from TOMM20. **D-F**, Two-color 4Pi dSTORM localizations of TOMM20 and Sec61 $\beta$ . **G-I** Astigmatic 3D fluorogenic DNA-PAINT localizations from Sec61 $\beta$ . **A/D/G**, x-y view of localized point cloud. **B/E/H**, x-y view of resulting surface. **C/F/I**, x-z view of surfaces and points overlaid. Scale bars are 1  $\mu$ m (**A,B,D,E,G,H**) and 200 nm (**C,F,I**).

Z. Marin, L.A. Fuentes, J. Bewersdorf and D. Baddeley

## AUTHOR CONTRIBUTIONS

ZM and DB designed and implemented the algorithm. LF tested the algorithm, prepared samples, imaged the biological data and created the surface reconstructions of the biological data. JB provided critical feedback on the algorithm and the biological test case. All authors wrote the manuscript.

## ACKNOWLEDGMENTS

The authors wish to thank Michael Murrell, Megan King, Andrew Barentine, Yongdeng Zhang, Lena Schroder, Florian Schueder and Frederic Pincet for helpful discussions.

## REFERENCES

1. Quemeneur, F., J. K. Sigurdsson, M. Renner, P. J. Atzberger, P. Bassereau, and D. Lacoste, 2014. Shape matters in protein mobility within membranes. *Proceedings of the National Academy of Sciences of the United States of America* 111:5083–5087.
2. Westrate, L., J. Lee, W. Prinz, and G. Voeltz, 2015. Form Follows Function: The Importance of Endoplasmic Reticulum Shape. *Annual Review of Biochemistry* 84:791–811.
3. Tarazón, E., E. Roselló-Lletí, A. Ortega, C. Gil-Cayuela, J. R. González-Juanatey, F. Lago, L. Martínez-Dolz, M. Portolés, and M. Rivera, 2017. Changes in human Golgi apparatus reflect new left ventricular dimensions and function in dilated cardiomyopathy patients. *European Journal of Heart Failure* 19:280–282. <https://onlinelibrary.wiley.com/doi/10.1002/ejhf.671>.
4. Kaksonen, M., and A. Roux, 2018. Mechanisms of clathrin-mediated endocytosis. *Nature Reviews Molecular Cell Biology* 19:313–326. <http://www.nature.com/articles/nrm.2017.132>.
5. Haupt, A., and N. Minc, 2018. How cells sense their own shape – mechanisms to probe cell geometry and their implications in cellular organization and function. *Journal of Cell Science* 131:jcs214015. <https://journals.biologists.com/jcs/article/131/6/jcs214015/57077/How-cells-sense-their-own-shape-mechanisms-to>.
6. Colina-Tenorio, L., P. Horten, N. Pfanner, and H. Rampelt, 2020. Shaping the mitochondrial inner membrane in health and disease. *Journal of Internal Medicine* 287:645–664. <https://onlinelibrary.wiley.com/doi/10.1111/joim.13031>.
7. Dias, C., and J. Nylandsted, 2021. Plasma membrane integrity in health and disease: significance and therapeutic potential. *Cell Discovery* 7:4. <http://www.nature.com/articles/s41421-020-00233-2>.
8. Goyal, U., and C. Blackstone, 2013. Untangling the web: Mechanisms underlying ER network formation. *Biochimica et Biophysica Acta (BBA) - Molecular Cell Research* 1833:2492–2498. <https://linkinghub.elsevier.com/retrieve/pii/S0167488913001699>.
9. Ladinsky, M. S., D. N. Mastrorade, J. R. McIntosh, K. E. Howell, and L. A. Staehelin, 1999. Golgi Structure in Three Dimensions: Functional Insights from the Normal Rat Kidney Cell. *Journal of Cell Biology* 144:1135–1149. <https://rupress.org/jcb/article/144/6/1135/16083/Golgi-Structure-in-Three-Dimensions-Functional>.
10. Hecksel, C. W., M. C. Darrow, W. Dai, J. G. Galaz-Montoya, J. A. Chin, P. G. Mitchell, S. Chen, J. Jakana, M. F. Schmid, and W. Chiu, 2016. Quantifying Variability of Manual Annotation in Cryo-Electron Tomograms. *Microscopy and Microanalysis* 21.
11. Heinrich, L., D. Bennett, D. Ackerman, W. Park, J. Bogovic, N. Eckstein, A. Petruncio, J. Clements, S. Pang, C. S. Xu, J. Funke, W. Korff, H. F. Hess, J. Lippincott-Schwartz, S. Saalfeld, A. V. Weigel, COSEM Project Team, R. Ali, R. Arruda, R. Bahtra, and D. Nguyen, 2021. Whole-cell organelle segmentation in volume electron microscopy. *Nature* 599:141–146. <https://www.nature.com/articles/s41586-021-03977-3>.
12. Dahlberg, P. D., and W. E. Moerner, 2021. Cryogenic Super-Resolution Fluorescence and Electron Microscopy Correlated at the Nanoscale. *Annual Review of Physical Chemistry* 72:253–278. <https://doi.org/10.1146/annurev-physchem-090319-051546>, eprint: <https://doi.org/10.1146/annurev-physchem-090319-051546>.

13. Griffiths, G., and J. M. Lucocq, 2014. Antibodies for immunolabeling by light and electron microscopy: not for the faint hearted. *Histochemistry and Cell Biology* 142:347–360. <http://link.springer.com/10.1007/s00418-014-1263-5>.
14. Bond, C., A. N. Santiago-Ruiz, Q. Tang, and M. Lakadamyali, 2022. Technological advances in super-resolution microscopy to study cellular processes. *Molecular Cell* 82:315–332. <https://www.sciencedirect.com/science/article/pii/S1097276521010844>.
15. Milo, R., and R. Phillips, 2016. Cell biology by the numbers. Taylor & Francis Group.
16. Wang, Z., and M. Menenti, 2021. Challenges and Opportunities in Lidar Remote Sensing. *Frontiers in Remote Sensing* 2. <https://www.frontiersin.org/article/10.3389/frsen.2021.641723>.
17. Curless, B., 1999. From Range Scans to 3D Models. *SIGGRAPH Comput. Graph.* 33:38–41. <https://doi.org/10.1145/345370.345399>.
18. Kazhdan, M., and H. Hoppe, 2013. Screened poisson surface reconstruction. *ACM Transactions on Graphics* 32:1–13.
19. Yoon, J., C. J. Comerci, L. E. Weiss, L. Milenkovic, T. Stearns, and W. E. Moerner, 2019. Revealing Nanoscale Morphology of the Primary Cilium Using Super-Resolution Fluorescence Microscopy. *Biophysical Journal* 116:319–329. <https://doi.org/10.1016/j.bpj.2018.11.3136>, publisher: Biophysical Society.
20. Lelek, M., M. T. Gyparaki, G. Beliu, F. Schueder, J. Griffié, S. Manley, R. Jungmann, M. Sauer, M. Lakadamyali, and C. Zimmer, 2021. Single-molecule localization microscopy. *Nature Reviews Methods Primers* 1:39. <http://www.nature.com/articles/s43586-021-00038-x>.
21. Zhao, Y., S. M. Schreiner, P. K. Koo, P. Colombi, M. C. King, and S. G. Mochrie, 2016. Improved Determination of Subnuclear Position Enabled by Three-Dimensional Membrane Reconstruction. *Biophysical Journal* 111:19–24. <http://dx.doi.org/10.1016/j.bpj.2016.05.036>, publisher: Biophysical Society.
22. Brakke, K. A., 1992. The surface evolver. *Experimental Mathematics* 1:141–165.
23. Terasaki, M., T. Shemesh, N. Kasthuri, R. W. Klemm, R. Schalek, K. J. Hayworth, A. R. Hand, M. Yankova, G. Huber, J. W. Lichtman, T. A. Rapoport, and M. M. Kozlov, 2013. Stacked Endoplasmic Reticulum Sheets Are Connected by Helicoidal Membrane Motifs. *Cell* 154:285–296. <http://dx.doi.org/10.1016/j.cell.2013.06.031>, publisher: Elsevier Inc.
24. Marin, Z., M. Graff, A. E. S. Barentine, C. Soeller, K. K. H. Chung, L. A. Fuentes, and D. Baddeley, 2021. PYMEVisualize: an open-source tool for exploring 3D super-resolution data. *Nature Methods* 18:582–584. <http://www.nature.com/articles/s41592-021-01165-9>.
25. Meagher, D., 1980. Octree Encoding: A New Technique for the Representation, Manipulation and Display of Arbitrary 3-D Objects by Computer. Technical Report Technical Report IPL-TR-80-111, Rensselaer Polytechnic Institute.
26. Baddeley, D., M. B. Cannell, and C. Soeller, 2010. Visualization of localization microscopy data. *Microscopy and Microanalysis* 16:64–72. Publisher: Yale University Library.
27. Schaefer, S., and J. Warren, 2005. Dual marching cubes: Primal contouring of dual grids. *Computer Graphics Forum* 24:195–201. Publisher: IEEE.
28. Botsch, M., and L. Kobbelt, 2004. A remeshing approach to multiresolution modeling. *ACM International Conference Proceeding Series* 71:185–192.
29. Press, W. H., S. A. Teukolsky, W. T. Vetterling, and B. P. Flannery, 2007. Numerical Recipes 3rd Edition: The Art of Scientific Computing. Cambridge University Press, USA, 3 edition.
30. Nelson, D., T. Piran, and S. Weinberg, 2004. Statistical Mechanics of Membranes and Surfaces. World Scientific. <https://www.worldscientific.com/doi/abs/10.1142/9789814541602>.
31. Chung, K. K. H., Z. Zhang, P. Kidd, Y. Zhang, N. D. Williams, B. Rollins, Y. Yang, C. Lin, D. Baddeley, and J. Bewersdorf, 2022. Fluorogenic DNA-PAINT for faster, low-background super-resolution imaging. *Nature Methods* <https://www.nature.com/articles/s41592-022-01464-9>.

Z. Marin, L.A. Fuentes, J. Bewersdorf and D. Baddeley

32. Zhang, Y., L. K. Schroeder, M. D. Lessard, P. Kidd, J. Chung, Y. Song, L. Benedetti, Y. Li, J. Ries, J. B. Grimm, L. D. Lavis, P. De Camilli, J. E. Rothman, D. Baddeley, and J. Bewersdorf, 2020. Nanoscale subcellular architecture revealed by multicolor three-dimensional salvaged fluorescence imaging. *Nature Methods* 17:225–231. <http://dx.doi.org/10.1038/s41592-019-0676-4>, publisher: Springer US.
33. Tyson, J., K. Hu, S. Zheng, P. Kidd, N. Dadina, L. Chu, D. Toomre, J. Bewersdorf, and A. Schepartz, 2021. Extremely Bright, Near-IR Emitting Spontaneously Blinking Fluorophores Enable Ratiometric Multicolor Nanoscopy in Live Cells. *ACS Central Science* 7:1419–1426.
34. Huang, F., G. Sirinakis, E. S. Allgeyer, L. K. Schroeder, W. C. Duim, E. B. Kromann, T. Phan, F. E. Rivera-Molina, J. R. Myers, I. Irnov, M. Lessard, Y. Zhang, M. A. Handel, C. Jacobs-Wagner, C. P. Lusk, J. E. Rothman, D. Toomre, M. J. Booth, and J. Bewersdorf, 2016. Ultra-High Resolution 3D Imaging of Whole Cells. *Cell* 166:1028–1040. <http://dx.doi.org/10.1016/j.cell.2016.06.016>.
35. Schroeder, L. K., A. E. Barentine, H. Merta, S. Schweighofer, Y. Zhang, D. Baddeley, J. Bewersdorf, and S. Bahmanyar, 2019. Dynamic nanoscale morphology of the ER surveyed by STED microscopy. *The Journal of Cell Biology* jcb.201809107–jcb.201809107. <http://www.jcb.org/lookup/doi/10.1083/jcb.201809107>.
36. Wu, H., P. Carvalho, and G. K. Voeltz, 2018. Here, there, and everywhere: The importance of ER membrane contact sites. *Science* 361.
37. Bassereau, P., R. Jin, T. Baumgart, M. Deserno, R. Dimova, V. A. Frolov, P. V. Bashkirov, H. Grubmüller, R. Jahn, H. J. Risselada, L. Johannes, M. M. Kozlov, R. Lipowsky, T. J. Pucadyil, W. F. Zeno, J. C. Stachowiak, D. Stamou, A. Breuer, L. Lauritsen, C. Simon, C. Sykes, G. A. Voth, and T. R. Weikl, 2018. The 2018 biomembrane curvature and remodeling roadmap. *Journal of Physics D: Applied Physics* 51:343001. <https://doi.org/10.1088/1361-6463/aacb98>.
