# Supplementary material for: Extracting nanoscale membrane morphology from single-molecule localizations
Source: bioRxiv or medRxiv preprint supplement (doi:10.1101/2023.01.26.525798), 2023-06-17
Supplement: Supplementary file [file media-1.pdf]

## SUPPLEMENTARY MATERIAL

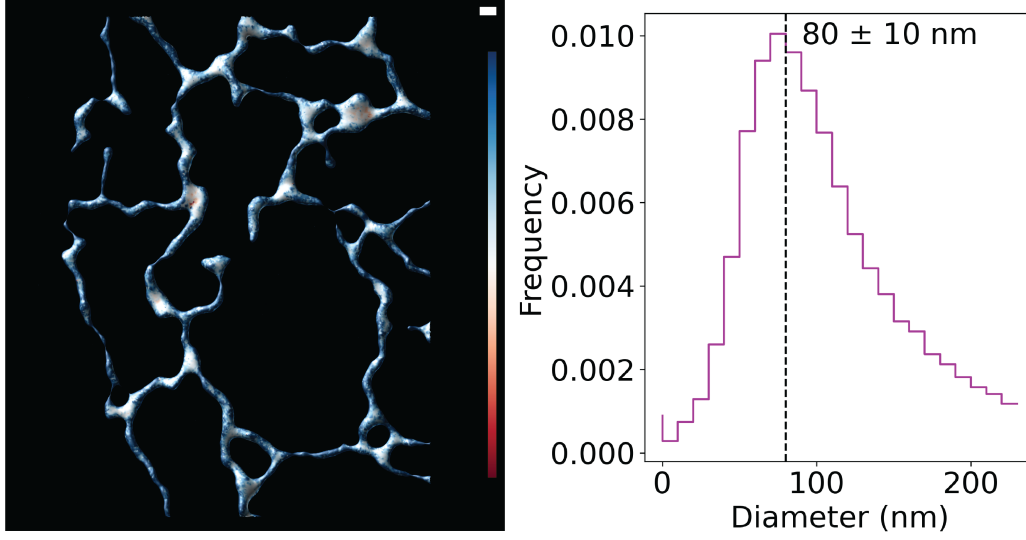

Figure S1: **Left**, Tubular ER from the lower left portion of Figure 3, colored by mean curvature. Lookup table:  $-0.01$  to  $0.01 \text{ nm}^{-1}$ . Scale bar is  $200 \text{ nm}$ . **Right**, Histogram of  $D = 2/k_{\max,l}$  where  $k_{\max,l}$  is the maximal principal curvature of vertex  $l$ . The mean and standard error of the mean for the diameter distribution are reported.

### Point cloud simulation

In order to demonstrate the effectiveness of the algorithm, it was necessary to generate biologically-motivated test structures. To do this, we established a constructive solid geometry library where each primitive is represented as a signed distance function (SDF).

Points were generated from a test structure using Monte-Carlo sampling of an octree of the structure's SDF. The octree subdivides space that straddles where the SDF goes to zero until a fixed sampling rate  $dx$  is reached. The center of each octree box with an absolute SDF value of less than  $dx$  is kept with a probability of  $p$  and rejected otherwise. This results in a point set of size  $S$ .

Next, non-specific localizations are simulated. For a given noise fraction  $n$ ,  $J = \frac{nS}{1-n}$  additional points are generated with uniform randomness over the bounding box of the point set. This ensures  $J/T = n$  for  $T = J + S$  total points.

To simulate localization precision, each point  $i$  in the resulting point set is jittered by sampling values from a Gaussian with mean  $\mu_i$  equivalent to the location of point  $i \in 0 \dots T - 1$  and standard deviation  $\sigma_{i,e}$  for  $e \in x, y, z$ . Up to  $N$  samples are generated per point. The total point set is then clipped to size  $T$  via random uniform selection of points.

The uncertainty  $\sigma_{i,e}$  is calculated by simulating an exponential distribution with a mean value of  $\rho$ , corresponding to the average photon count of a simulated localization. This distribution is clipped to only contain values greater than a background photon count  $b$ , simulating the noise floor for data collection. For the remaining counts, the first  $S$  are selected and

$$\sigma_{i,e} = \frac{r_e}{2.355\sqrt{\rho_i}}$$

where  $r_e$  is the resolution of the simulated system along axis  $e$ .

### Meshing parameters

To generate the parameter space for evaluation of SPR meshes derived from simulated data in Figure 2, we followed recommendations in (18). For SPR we estimated normals from 10, 30, 50 and 100 nearest neighbors, set the smoothing parameter  $\alpha = 0, 1, 2$  and 4, and set the samples-per-node to 1.5, 5, 10, 20 and 30. We used an octree depth of 8, 8 Gauss-Seidel relaxations, and a scale factor of 1.1.

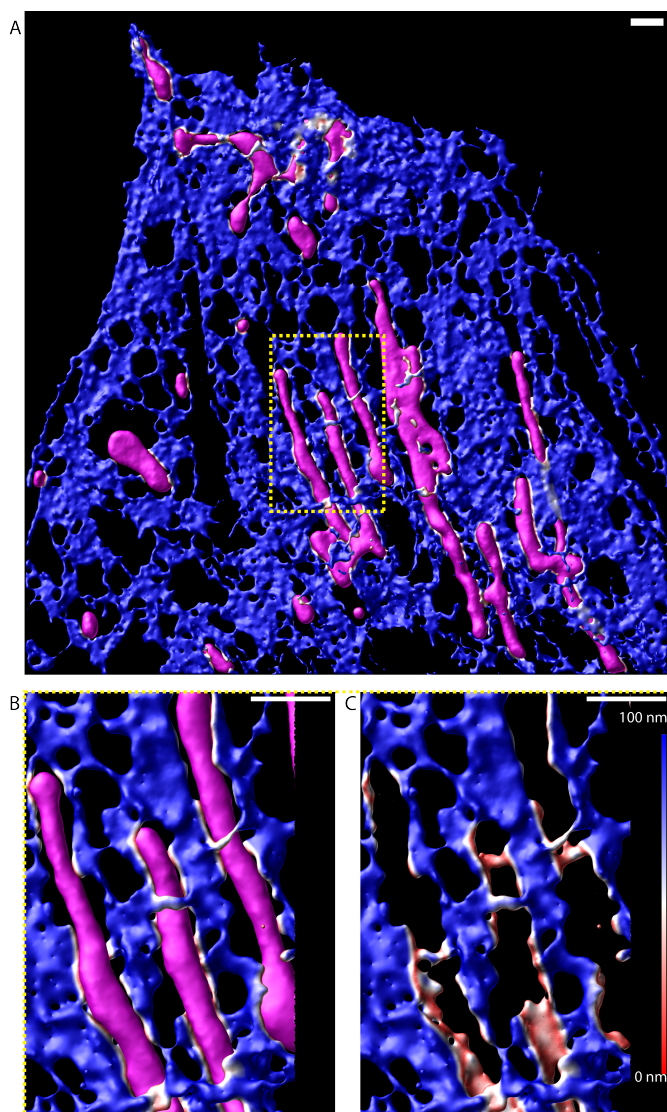

Figure S2: Distance between two surfaces. Surface generated from Sec61 $\beta$  localizations (red-white-blue) and surface generated from TOMM20 localizations (magenta). The Sec61 $\beta$  surface is colored by its distance from the TOMM20 surface (0 to 100 nm; red to blue). **A**, Full field of view, displaying both surfaces. **B**, Region of interest, showing both surfaces. **C**, The Sec61 $\beta$  surface alone. Scale bars are 1  $\mu$ m.

For our method, we compared maximum number of iterations 19 and 39, a variety of starting threshold densities,  $5 \times 10^{-6}$ ,  $1 \times 10^{-5}$ ,  $2 \times 10^{-5}$ ,  $5 \times 10^{-5}$ ,  $1 \times 10^{-4}$ ,  $2 \times 10^{-4}$ ,  $4 \times 10^{-4}$ ,  $1 \times 10^{-3}$ ,  $2 \times 10^{-3}$ , and  $\lambda = 10, 15, 25$ . We remeshed every 5 iterations.

|                     | Max iters | Curvature weight | Remesh frequency | Neck first iter | Punch frequency | Kc  | Minimum edge length | Smooth curvature | Truncate at |
|---------------------|-----------|------------------|------------------|-----------------|-----------------|-----|---------------------|------------------|-------------|
| Figure 3            | 19        | 20               | 5                | 0               | 0               | 1.0 | 10                  | True             | 1000        |
| Figure 4 A-C        | 29        | 20               | 5                | 0               | 0               | 1.0 | 10                  | True             | 1000        |
| Figure 4 D-F (ER)   | 29        | 20               | 5                | 0               | 0               | 1.0 | 10                  | True             | 1000        |
| Figure 4 D-F (Mito) | 49        | 20               | 5                | 0               | 0               | 1.0 | 10                  | True             | 1000        |
| Figure 4 G-I        | 9         | 20               | 5                | 0               | 0               | 1.0 | 10                  | True             | 1000        |

Table S1: Parameters used for iterative surface fitting of experimental data in this paper.

## USER GUIDE

This tutorial will walk you through using the shrink-wrapping method within PYMEVisualize to create 3D surfaces based on a provided 3D point-cloud data set (`user-guide-data.hdf`). After completing this tutorial, you should be able to apply the same approach to shrink-wrap your own 3D point-cloud data sets. If you are unfamiliar with using PYMEVisualize, we strongly encourage you to first [install PYME](#) and go through the [PYMEVisualize User Guide](#) to understand the basics of the program before moving on to this tutorial (24).

### Install the Shrink-wrap Plugin

You can find the GitHub repository for the shrink-wrap plugin and installation instructions [here](#).

### Download and import tutorial data set

Download the data set `user-guide-data.hdf` found in the supplementary materials. Launch a PYMEVisualize window by entering `visgui` into an Anaconda prompt with the PYME environment activated. Navigate to **File** → **Open** and select the `user-guide-data.hdf` file. To improve the visualization of our data, under the "Layers" side tab change "Method" to *pointsprites*, "Colour" to *z*, "Alpha" to *0.2*, and "Point size" to *10*. Your PYMEVisualize window should look identical to Figure [S3](#) now.

### Create initial isosurface

You can learn about PYMEVisualize isosurfaces and how to make them [here](#). Once you're familiar with how to create an isosurface, use the parameters shown in Figure [S4](#) to create an isosurface based on the `user-guide-data.hdf` points. Once finished, you should see a 3D surface rendered with your points. Change "Method" to *wireframe* to more easily visualize how well the isosurface adheres to the point cloud. It should look something like Figure [S5](#). At this point, it is a good idea to assess the overall accuracy of this initial isosurface. You can alter the parameters for the isosurface in the **Data Pipeline** tab on the left under **DualMarchingCubes**. It is typical to test several parameters before settling on the best options with "N points min" and "Threshold density" being the two major parameters requiring tweaking. It should be noted that this data set is a small cropped region of interest (ROI) from a much larger data set. It is highly recommended that you test parameters for the initial isosurface (and the eventual shrink-wrapped surface) on a smaller ROI that has enough points to test the structure you're trying to create a surface from, but no more than that (about 20,000 points is ideal). The time required to create the surfaces scales roughly with the number of localizations, so testing parameters on large data sets is impractical. Once you establish which parameters are best with your smaller ROI, you can apply the same ones to the full data set. Learn how to create an ROI in PYMEVisualize [here](#).

### Create shrink-wrapped surface

Now that we have our initial isosurface, we can use it to create a shrink-wrapped surface. You will find this option under **Mesh** → **Shrinkwrap membrane surface**. Once selected, a new window will pop up for you to select the parameters you'd like to use. Refer to Table [S2](#) for descriptions of what each parameter is and what typical values are for it. For this tutorial, use the parameters shown in [S6](#). This process can take a minute or so. Check the Anaconda prompt for output to confirm it is running. Once finished, your shrink-wrapped surface should look similar to [S7](#).

### Additional tips for shrink wrapping surfaces

The following are tips for situations that did not come up in the tutorial, but occur frequently enough to warrant mentioning:

- An error that can occur when attempting to shrink wrap is the "singular matrix" error. This simply means that the operation reached a point that was mathematically impossible to calculate. It is most often caused by several surfaces being present after creating an isosurface, especially small surfaces that are often capturing background localizations. Most of the time, this can be fixed by removing all but the largest surface present. To do so, enter the following line in the **Shell** tab in PYMEVisualize: `pipeline.dataSources['surf0'].keep_largest_connected_component()`.

NOTE `surf0` should be the name of **your** isosurface. By default it is `surf0`, but can be a different name for various reasons.

NOTE This solution clearly isn't always reasonable to use. For data from an ER protein, it is reasonable since the ER is continuous. However, data from a mitochondrial protein is not so reasonable since mitochondria are discontinuous.



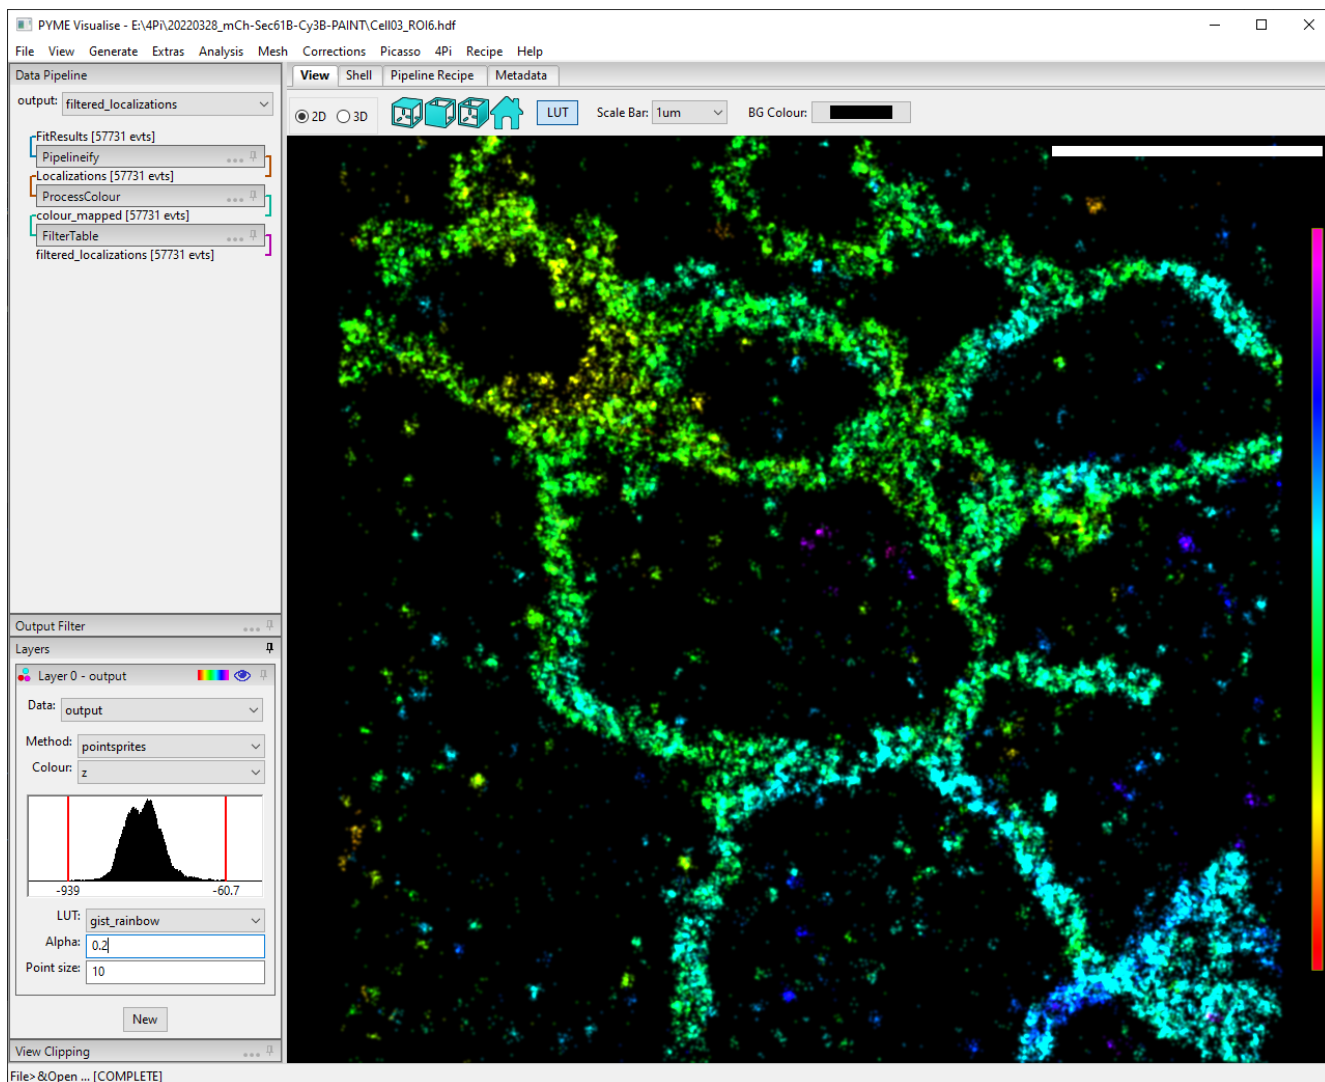

Figure S3: Data from user-guide-data.hdf displayed as 10 nm point sprites with 0.2 alpha. The points are colored by their location in the z-direction according to the lookup table on the right.

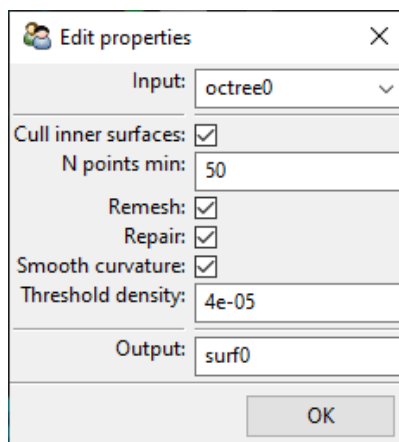

Figure S4: Ideal parameters to use to create an isosurface based on user-guide-data.hdf.

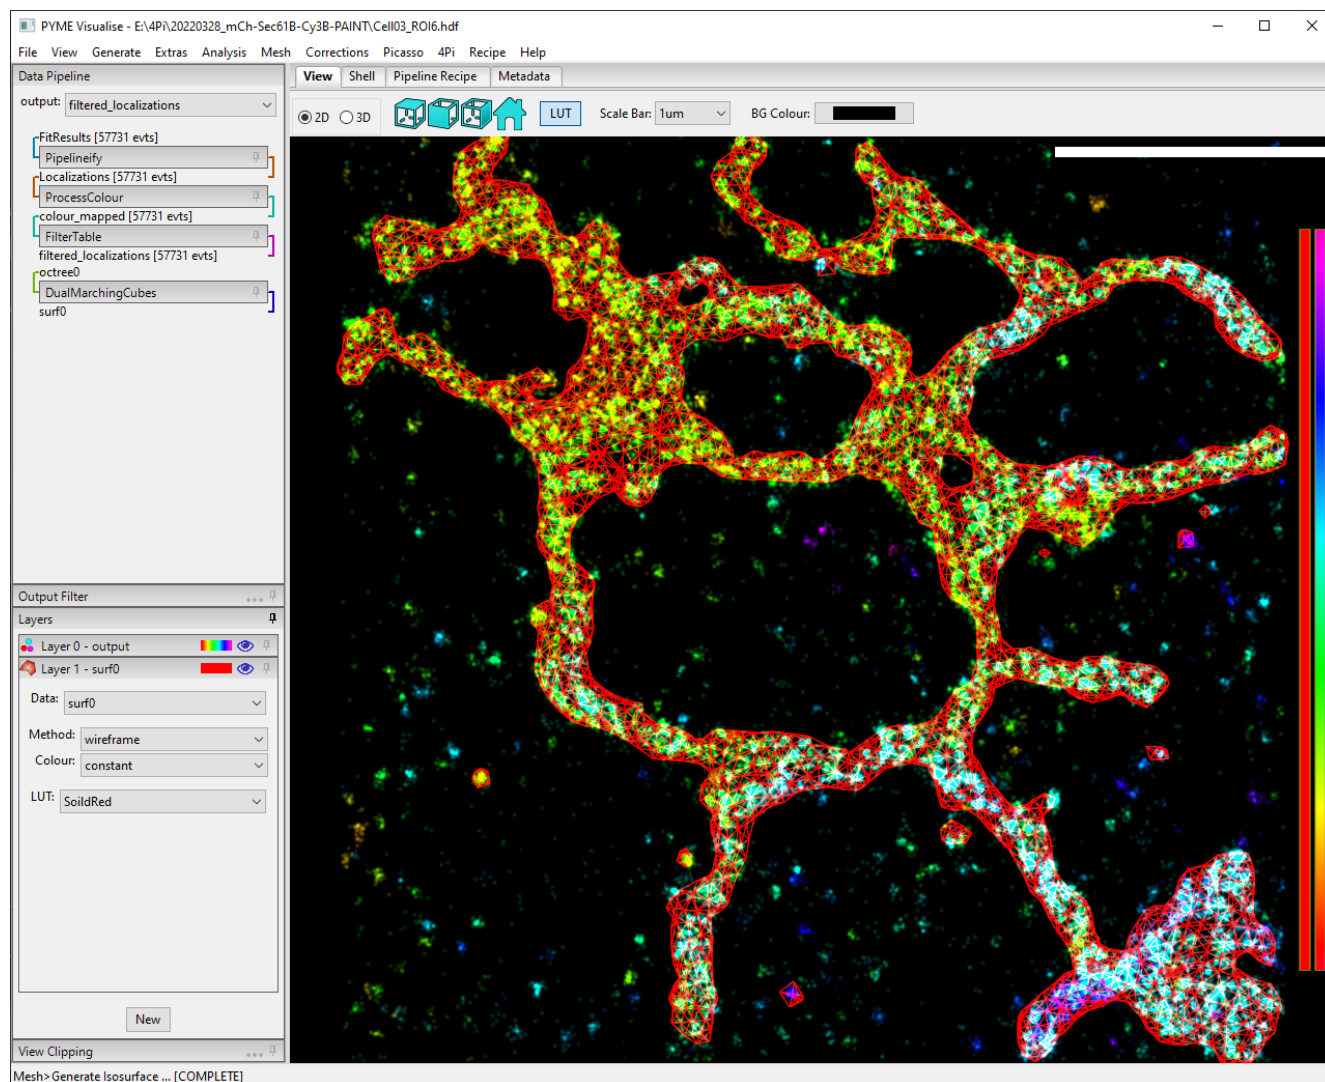

Figure S5: The isosurface generated using the parameters in S4. The isosurface is displayed using the *wireframe* method to make it easy to assess how well it fits the point cloud.

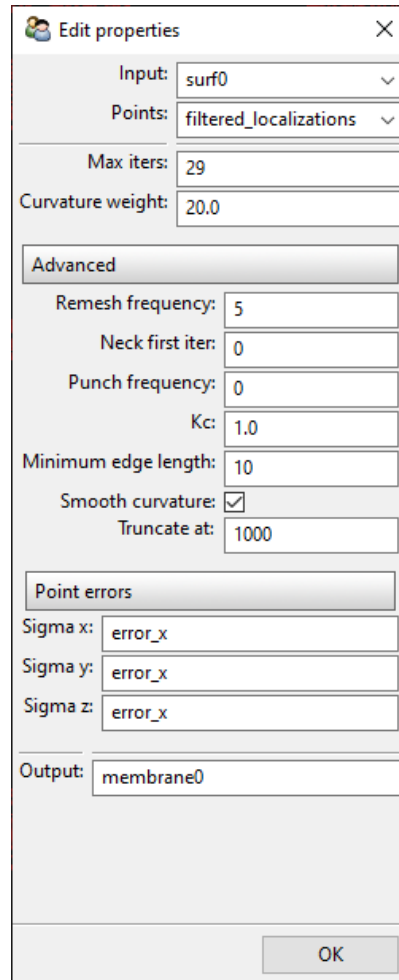

Figure S6: Ideal parameters to create a shrink-wrapped surface based on user-guide-data.hdf.

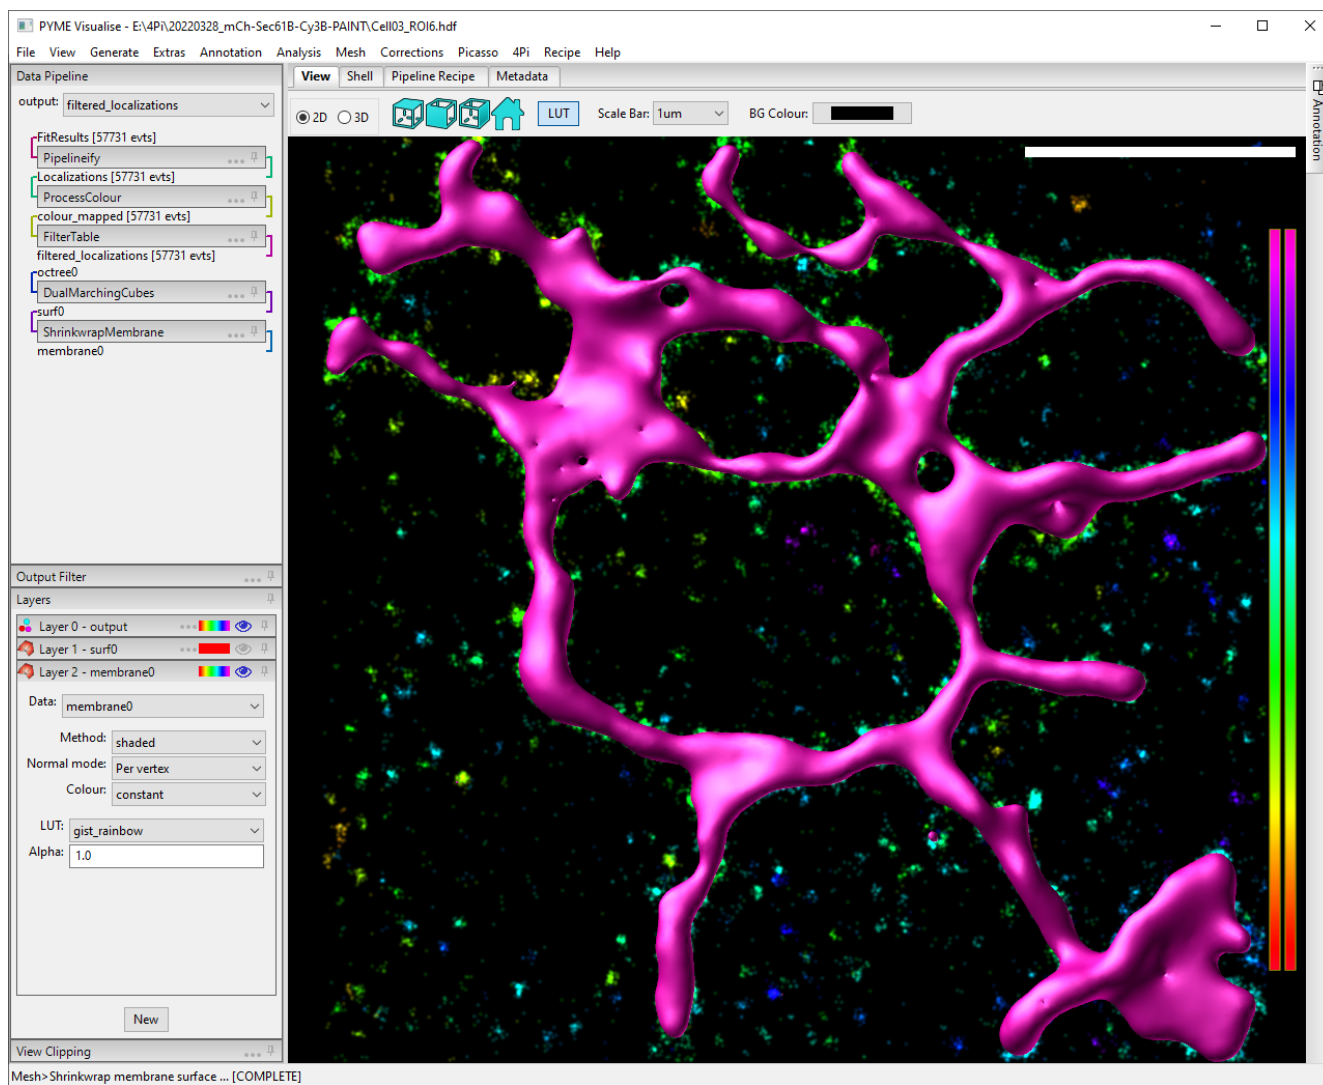

Figure S7: The shrink-wrapped surface generated using the parameters in S6.

| Parameter           | Description                                                                                                                                                                                      | Standard values          |
|---------------------|--------------------------------------------------------------------------------------------------------------------------------------------------------------------------------------------------|--------------------------|
| input               | The data source containing the coarse isosurface.                                                                                                                                                | surf0                    |
| Points              | The data source containing the points to fit.                                                                                                                                                    | filter_localizations     |
| Max iters           | Maximum number of fitting iterations.                                                                                                                                                            | 10 - 100                 |
| Curvature weight    | The contribution of curvature (vs. point attraction force) to the fitting procedure. Higher values create smoother surfaces.                                                                     | 10 - 100                 |
| Remesh frequency    | Remesh the isosurface every N iterations. Helps keep the fitting numerically stable. Should be often.                                                                                            | 5                        |
| Neck first iter     | Every neck first iter iterations, check for and remove necks in the mesh.                                                                                                                        | 9 (0 to not use necking) |
| neck_threshold_low  | Vertices with Gaussian curvature below this threshold are necks.                                                                                                                                 | -1.00E+03                |
| neck_threshold_high | Vertices with Gaussian curvature above this threshold are necks.                                                                                                                                 | 1.00E+02                 |
| Punch frequency     | Every punch frequency iterations, check for and add holes in regions of the mesh where there is a continuous empty area in between two "sides" of the mesh.                                      | 0                        |
| Kc                  | Lipid stiffness coefficient of membrane in eV (can be looked up in the literature).                                                                                                              | 0 - 1 (20k_bT)           |
| Minimum edge length | Small length that the edges joining surface vertices can be. Smaller means the surface is more finely sampled. Setting it to 10 is usually sufficient. Setting it to -1 removes any limit.       | 10                       |
| Smooth curvature    | Replace the fit curvature of a vertex with the average curvature of it and its neighbors                                                                                                         | True                     |
| Truncate at         | Stop after this many iterations no matter what. Useful for visualizing the behavior of a shrink wrap over time                                                                                   | 1000                     |
| sigma_x             | The variable in the points data source containing localization precision in the x-direction. If sigma is only known for one direction, supply it here and it will be assumed for all directions. |                          |
| sigma_y             | The variable in the points data source containing localization precision in the y-direction.                                                                                                     |                          |
| sigma_z             | The variable in the points data source containing localization precision in the z-direction.                                                                                                     |                          |
| output              | The name of the data source that will contain the fit isosurface.                                                                                                                                | membrane0                |

Table S2: Descriptions and standard values for all parameters used in the shrink-wrapping algorithm.

In the latter case, try to change the initial isosurface parameters, especially *N points min* and *Threshold density*, to resolve the error when shrink wrapping.

- If attempting to create several separate shrink-wrapped surfaces from multi-color data, make sure you are shrink wrapping to only the points belonging to the desired channel. By default, the algorithm uses `filtered_localizations` which includes all points in the data. To learn how to extract color channels from multi-color data in PYMEVisualize, please read the relevant documentation [here](#).
